# Supplementary material for: Three-dimensionally kinked high-conducting CoGe nanowire growth induced by rotational twinning
Source: Royal Society of Chemistry journal article supplement (doi:10.1039/c3tc31214c), 2013-01-01
Supplement: c3tc31214c.pdf [file c3tc31214c.pdf]

## Supplementary Information

### Three-Dimensionally Kinked High-Conducting CoGe Nanowire Growth Induced by Rotational Twinning

Hana Yoon,<sup>a,‡</sup> Si-in Kim,<sup>a,||</sup> Sunghoon Lee,<sup>a</sup> Juneho In,<sup>a</sup> Jihwan Kim,<sup>a</sup> Hyunseong Ryoo,<sup>a</sup>  
Jae-Hong Noh,<sup>b</sup> Jae-Pyoung Ahn,<sup>b</sup> Younghun Jo,<sup>c</sup> Jaebum Choo,<sup>\*d</sup> and Bongsoo Kim<sup>\*a</sup>

<sup>a</sup>Department of Chemistry, KAIST, Daejeon 305-701, Korea, <sup>b</sup>Advanced Analysis Center, KIST, Seoul 136-791, Korea, <sup>c</sup>Nano Materials Research Team, KBSI, Daejeon, 305-333, Korea, <sup>d</sup>Department of Bionano Engineering, Hanyang University, Ansan 426-791, Korea, <sup>‡</sup>Energy Storage Department, KIER, Daejeon 305-343, Korea

## 1. Experimental setup

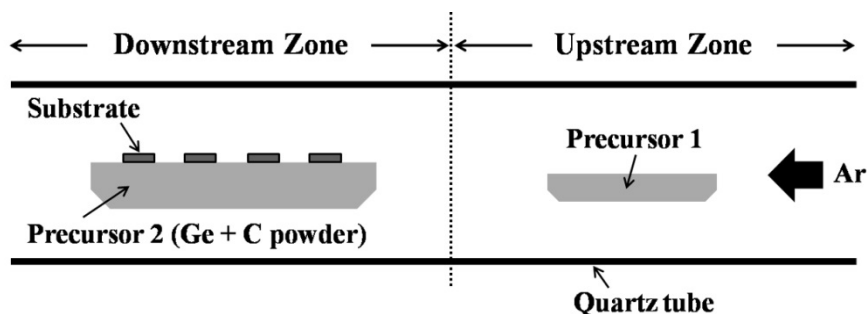

**Figure S1.** Experimental setup for synthesis of monoclinic CoGe NWs. The horizontal tube furnace has independently controlled two heating zones.

## 2. EDS spectrum

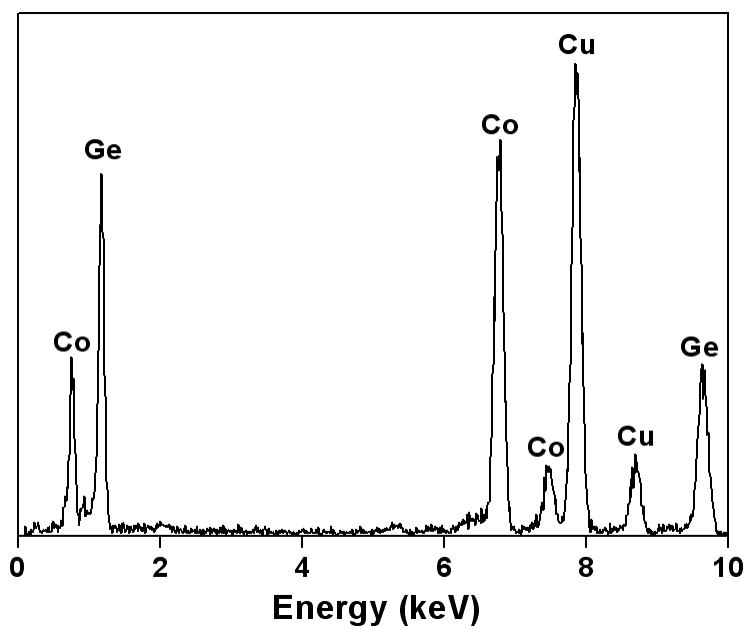

**Figure S2.** TEM-EDS spectrum of the horizontal NW in Figure 2 of the manuscript. The analysis of this result confirms that the NW contains only Co and Ge, in a ratio of  $\sim 1:1$  (Cu peaks are due to a TEM grid).

### 3. $\text{Co}_5\text{Ge}_7$ NWs grown on a YSZ (100)

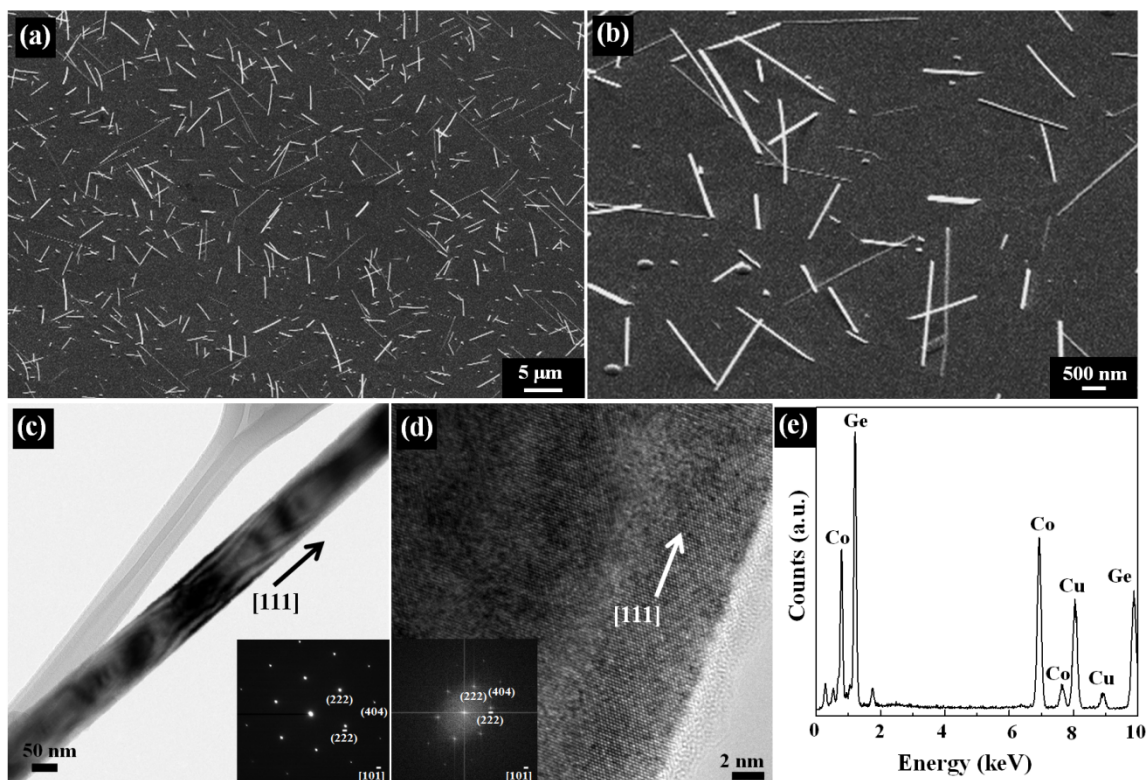

**Figure S3.** SEM and TEM analyses of  $\text{Co}_5\text{Ge}_7$  NWs grown on a YSZ (100) substrate. (a,b) SEM images of randomly-oriented  $\text{Co}_5\text{Ge}_7$  NWs. (c) Representative TEM image of NW. SAED pattern (inset of Figure S3(c)) is perfectly indexed to  $\text{Co}_5\text{Ge}_7$  with a tetragonal lattice along the  $[10\bar{1}]$  zone axis. The NWs have single crystallinity and grow along the  $[111]$  direction. (d) HRTEM image of the NW in (c). Inset shows FFT pattern (inset), which is also well matched to tetragonal  $\text{Co}_5\text{Ge}_7$  phase. (e) TEM-EDS spectrum of the NW in (c). The analysis of this result confirms that the NWs contain only Co and Ge, in a ratio of  $\sim 5:7$ .

#### 4. $\text{Co}_5\text{Ge}_7$ NWs grown on *c*-cut sapphire substrates

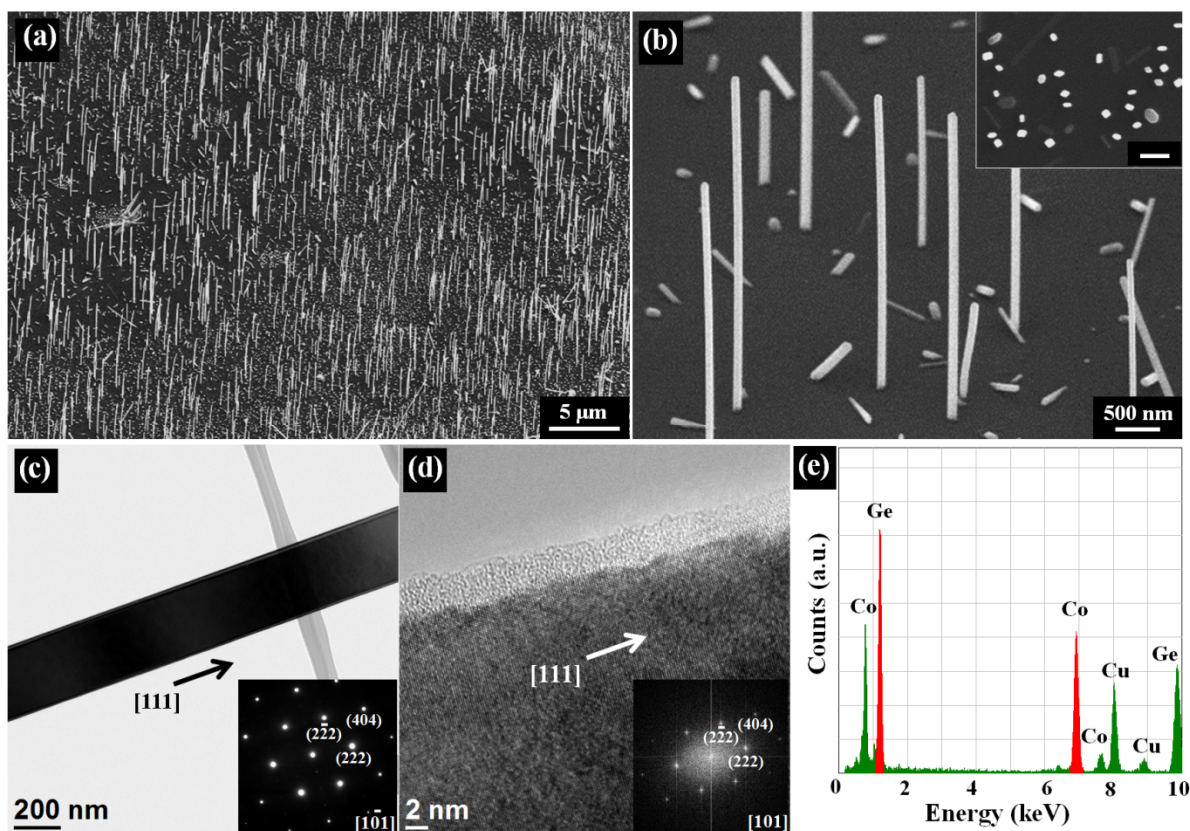

**Figure S4.** SEM and TEM analyses of  $\text{Co}_5\text{Ge}_7$  NWs grown on a *c*-cut sapphire substrate. (a,b) SEM images of vertically-grown  $\text{Co}_5\text{Ge}_7$  NWs on the substrate. (c) A representative TEM image of the  $\text{Co}_5\text{Ge}_7$  NW. The inset shows that the SAED pattern is perfectly indexed to  $\text{Co}_5\text{Ge}_7$  with a tetragonal lattice along the  $[10\bar{1}]$  zone axis. The NW has single crystallinity and grows along the  $[111]$  direction. (d) HRTEM image of the NW in (c). Inset shows an FFT pattern (inset), which is also well matched to a tetragonal  $\text{Co}_5\text{Ge}_7$  phase. (e) TEM-EDS spectrum of the NW in (c). The analysis of this result confirms that the NWs contain only Co and Ge, in a ratio of  $\sim 5:7$ .

## 5. TEM analysis of a free-standing CoGe NW

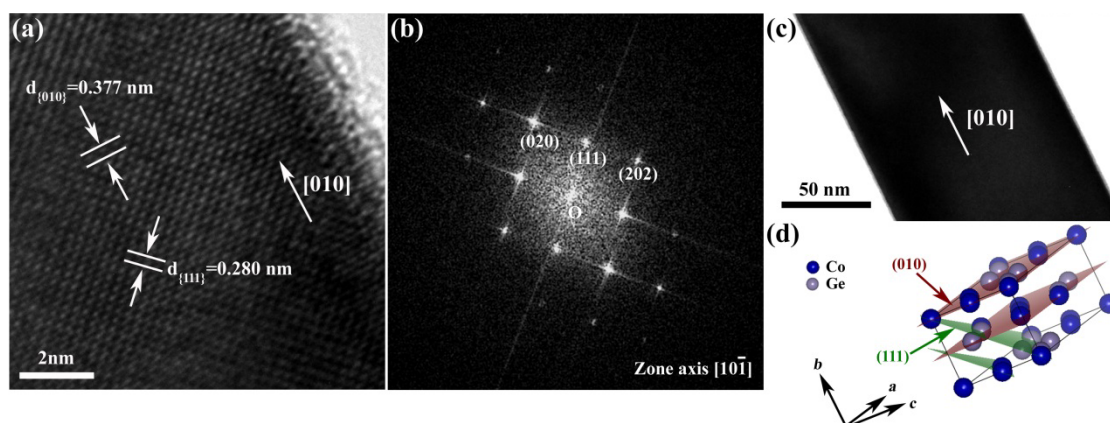

**Figure S5.** Detailed structural analysis of a free-standing CoGe NW directly grown on a YSZ substrate. (a) Representative HRTEM image. The observed lattice planes of a CoGe NW with a spacing of 0.377 and 0.280 nm correspond to the (010) and (111) planes of monoclinic CoGe, respectively. (b) The FFT pattern is perfectly indexed to CoGe with a monoclinic lattice along  $[10\bar{1}]$  zone axis. (c) The freestanding NWs grow along the  $[010]$  direction identical to the growth direction of horizontal NWs. (d) The atomic structure of monoclinic CoGe. The (010) and (111) planes are indicated by red and green regions.
